# Supplementary material for: Role of His63 in HutZ fromVibrio choleraein the heme degradation reaction and heme binding
Source: Royal Society of Chemistry journal article supplement (doi:10.1039/c9dt00926d), 2019-01-01
Supplement: c9dt00926d1.pdf [file c9dt00926d1.pdf]

## Electronic supplementary information

### **Role of Hydrogen Bonding to a Heme Propionate Group in the Heme Degradation Reaction by HutZ from *Vibrio cholerae*\***

Takeshi Uchida,<sup>\*1,2</sup> Nobuhiko Dojun,<sup>2</sup> Yukari Sekine,<sup>2</sup> and Koichiro Ishimori<sup>1,2</sup>

<sup>1</sup>Department of Chemistry, Faculty of Science, Hokkaido University, Sapporo 060-0810,  
Japan

<sup>2</sup>Graduate School of Chemical Sciences and Engineering, Hokkaido University, Sapporo  
060-8628, Japan

#### **Table of Contents**

Supplementary Figures

S2-S4

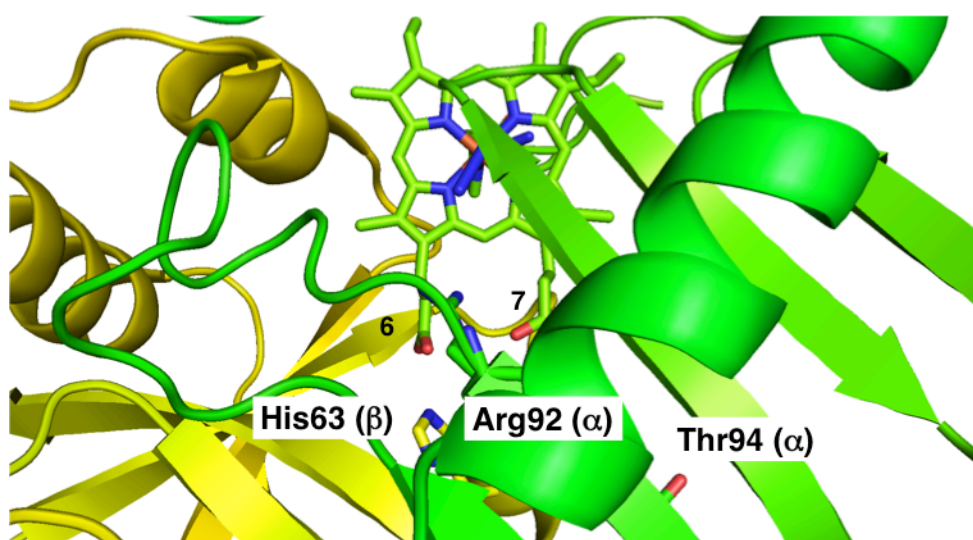

**Fig. S1** Top view of HugZ from *Helicobacter pylori* (PDB ID code 3GAS).

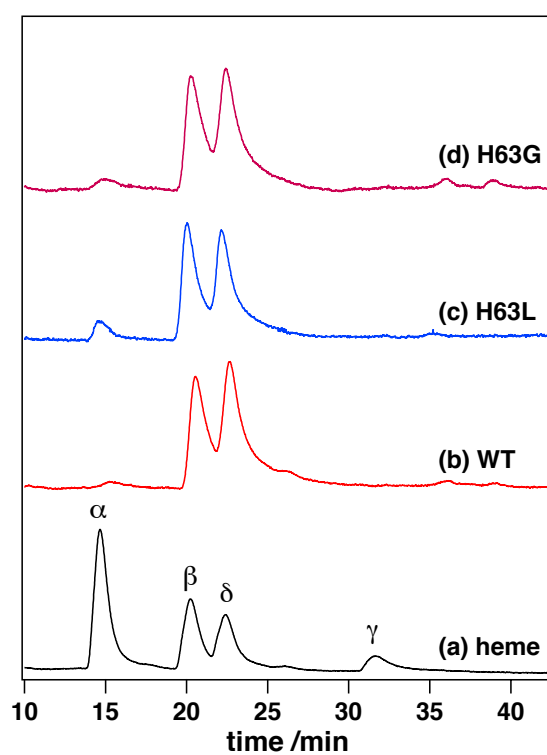

**Fig. S2** Regiospecificity of heme degradation by HutZ. HPLC chromatography of products from reaction of free heme (a), heme-WT (b), heme-H63L mutant (c) and heme-H63G mutant (d) with 0.1 mM  $\text{H}_2\text{O}_2$  and 1 mM ascorbic acid.

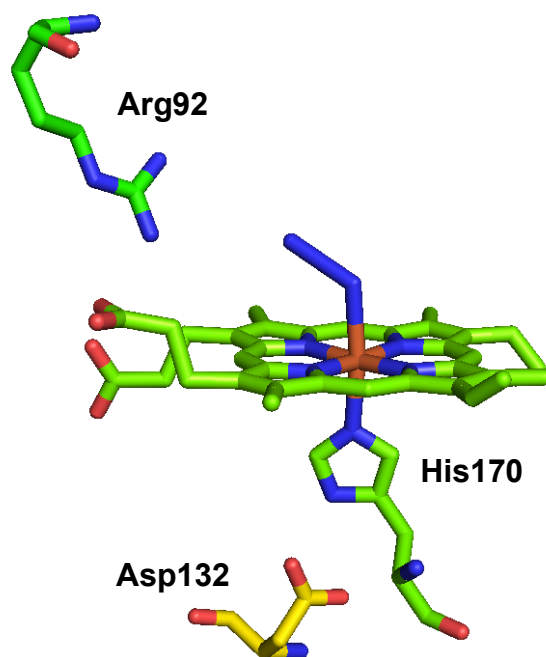

**Fig. S3** Crystal structure of HugZ from *H. pylori* (PDB 3GAS) at the heme-binding site. Residues are numbered according to the amino acid sequence of HutZ from *V. cholerae*..

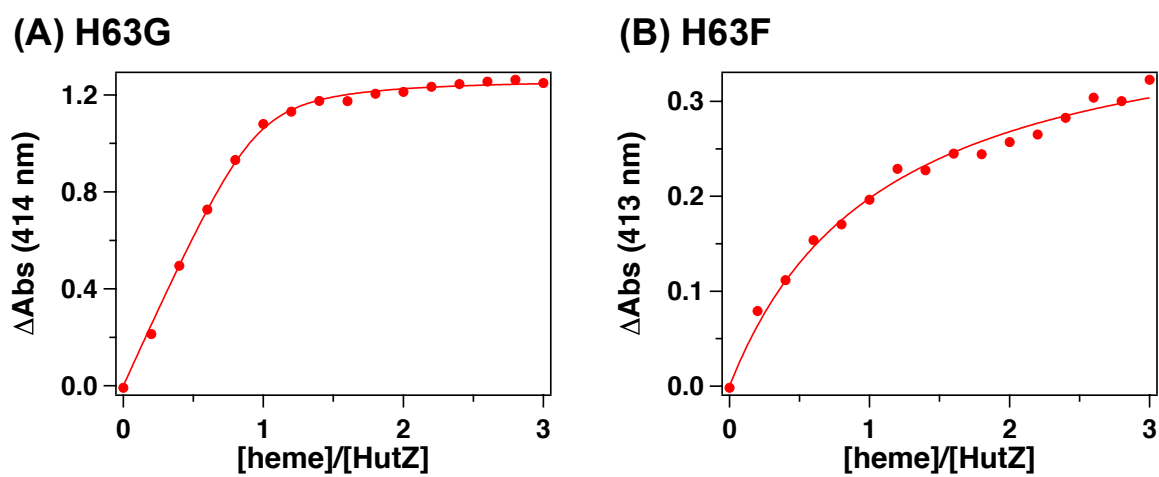

**Fig. S4** Heme titration plots of H63G and H63F mutant HutZ proteins. Heme binding curve generated from the difference absorbance of the Soret maximum by plotting  $\Delta A_{\text{Soret}}$  vs. molar ratios of heme to protein, specifically, H63G (A) and H63F at pH 8.0 (B) at pH 8.0 (D). The protein was in 10  $\mu\text{M}$  in 50 mM Tris-HCl, 150 mM NaCl (pH 8.0).

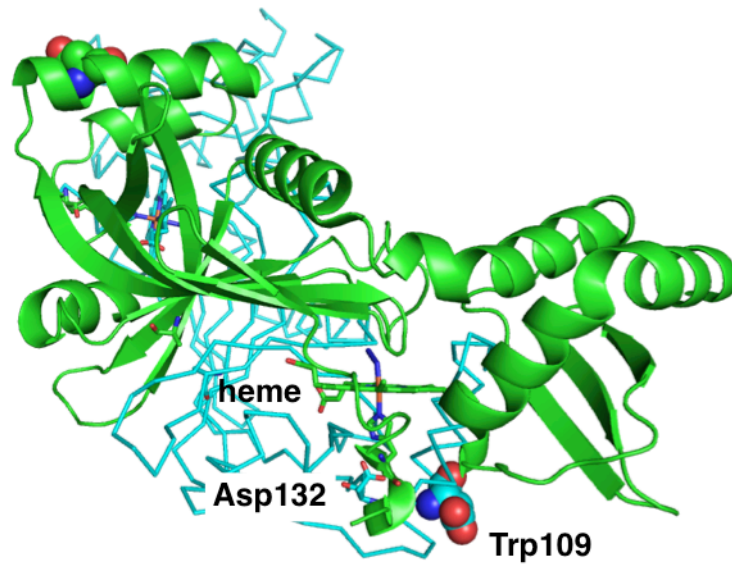

**Fig. S5** Location of Trp109 and heme on the HugZ crystal structure (PDB 3GAS). Residues are numbered according to the amino acid sequence of HutZ from *V. cholerae*. Green and cyan show each protomer. Trp109 is present in a different protomer (green) from that (cyan) containing nearby Asp132
